# Supplementary material for: The GeoTox Package: Open-source software for connecting spatiotemporal exposure to individual and population-level risk
Source: bioRxiv or medRxiv preprint supplement (doi:10.1101/2024.09.23.24314096), 2024-11-20
Supplement: Supplementary file [file media-1.pdf]

# 1 Supporting Information

This is the Supporting Information accompanying *The GeoTox Package: Open-source software for connecting spatiotemporal exposure to individual and population-level risk*. This document contains figures S1, S2, and S3.

## KCC2: Genotoxic Effects

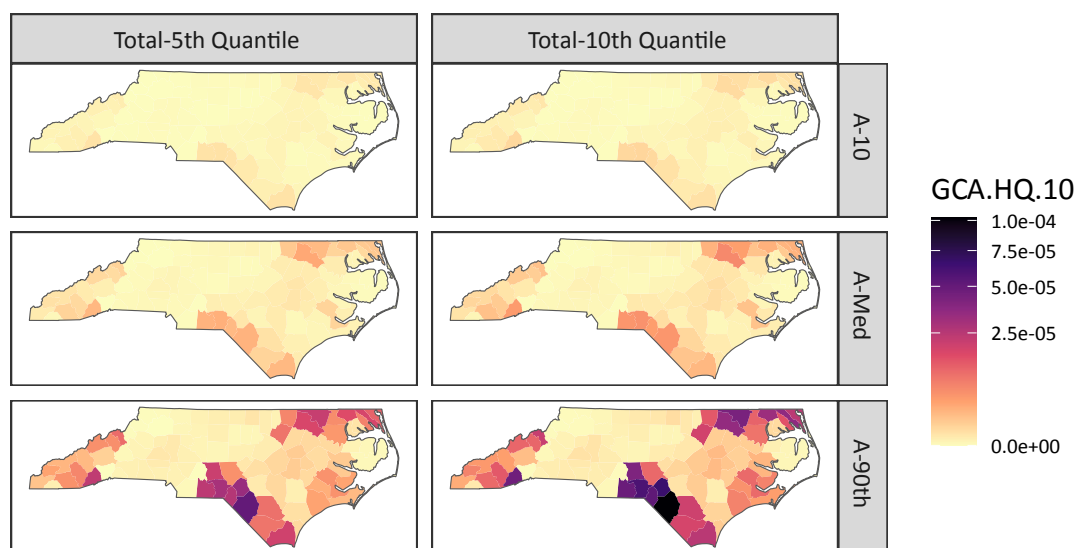

Figure S1: Multi-assay risk summaries for Key Characteristic of Carcinogens group 5 (genotoxic effects) mapped across North Carolina counties

### KCC5: Oxidative Stress

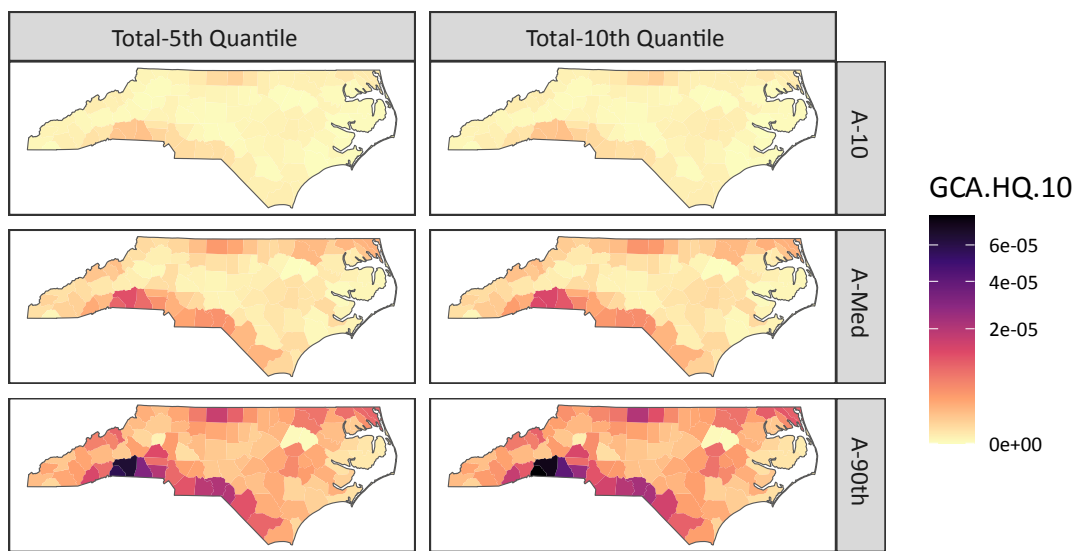

Figure S2: Multi-assay risk summaries for Key Characteristic of Carcinogens group 5 (oxidative stress) mapped across North Carolina counties

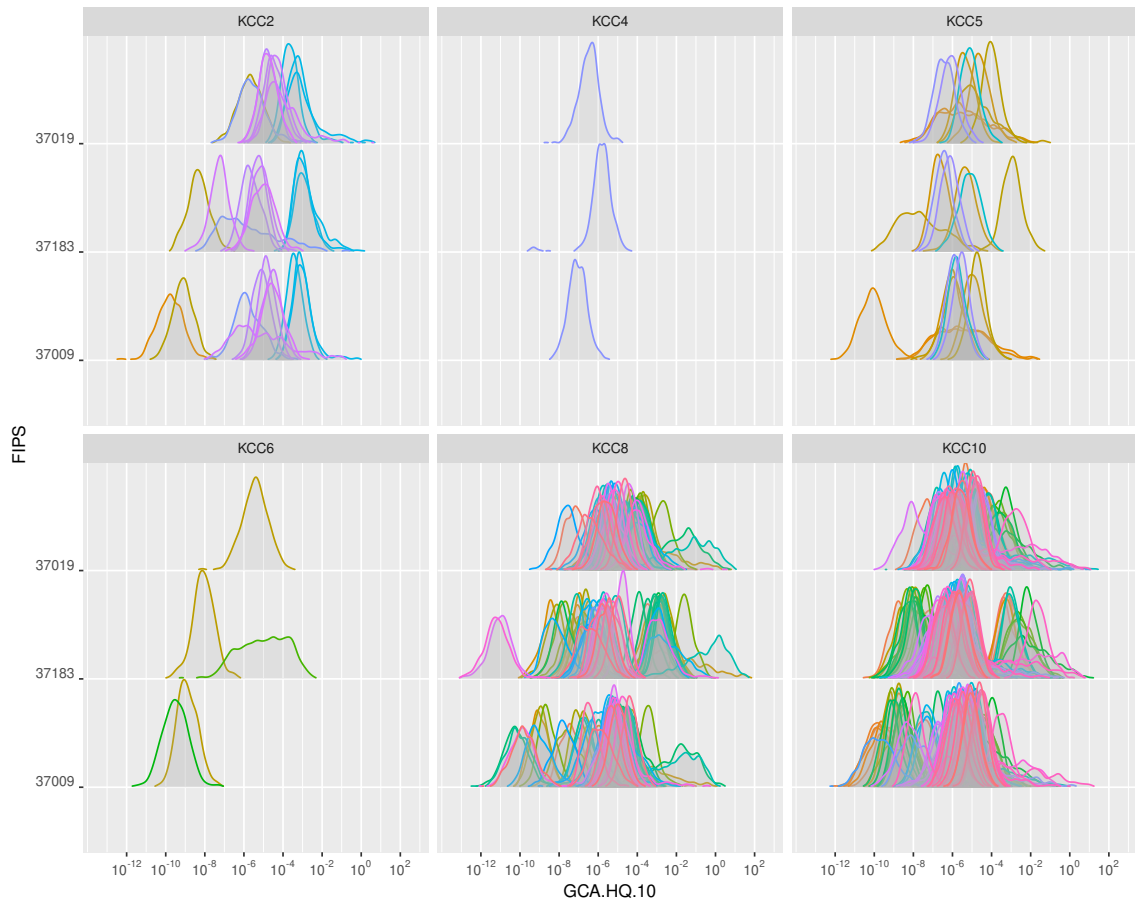

Figure S3: Hazard Quotient density by KCC mode of action
